# Supplementary material for: Fluorescent nanoparticles in the popular pizza: properties, biodistribution and cytotoxicity
Source: Royal Society of Chemistry journal article supplement (doi:10.1039/c8fo01944d), 2019-01-01
Supplement: c8fo01944d1.pdf [file c8fo01944d1.pdf]

## Supporting Information

### Fluorescent nanoparticles in the popular pizza: properties, biodistribution and cytotoxicity

Shuang Cong,<sup>1,2</sup> Nanying Wang,<sup>1,2</sup> Keni Wang,<sup>1</sup> Yanyang Wu,<sup>1</sup> Dongmei Li,<sup>1</sup> Yukun Song,<sup>1,2</sup> Sangeeta Prakash,<sup>3</sup> Mingqian Tan<sup>\*,1,2</sup>

<sup>1</sup> *School of Food Science and Technology, National Engineering Research Center of Seafood, Dalian Polytechnic University, Qinggongyuan1, Ganjingzi District, Dalian 116034, Liaoning, China*

<sup>2</sup> *Engineering Research Center of Seafood of Ministry of Education of China, Dalian 116034, Liaoning, China*

<sup>3</sup> *School of Agriculture and Food Sciences, The University of Queensland, Brisbane, QLD 4072, Australia*

\*Corresponding author (Tel & Fax: +86-411-86318657, E-mail: 2468750030@qq.com, ORCID: 0000000275350035)

## Methods

### Biodistribution of FNPs in Caco-2 Cells

Caco-2 cells were cultured in MEM supplemented with 20% FBS, penicillin (100 U/mL), streptomycin (100  $\mu\text{g/mL}$ ) and maintained in an incubator at 37 °C with 5%  $\text{CO}_2$  and a humidified atmosphere. Caco-2 cells were trypsinized and seeded in confocal culture dish at an initial cell density of  $1 \times 10^4$  cells/well. After 24 h in culture, FNPs dissolved in medium was added to the dish at a concentration of 1 mg/mL. Following incubation at 37 °C for 6 h, the cells were washed thoroughly with PBS three times and kept in PBS for imaging using a fluorescence inverted microscope (Eclipse Ti, Nikon, Tokyo, Japan) at 361-387 nm excitation wavelength.

### Atomic force microscopy (AFM) characterization

Morphology analysis of the pizza FNPs in different media were carried out in an atomic force microscopy (5500M, Hitachi, Tokyo, Japan). The height profile analysis was analyzed by the 5500 II software.

## Results

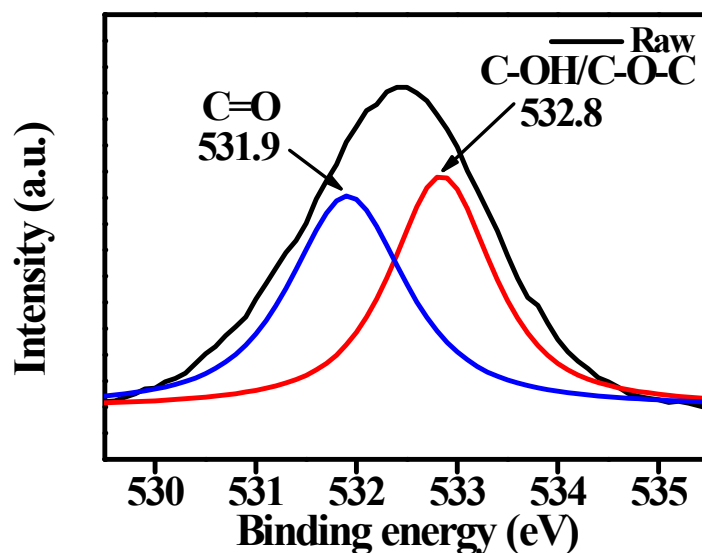

Figure S1. High-resolution XPS spectra of  $\text{O}_{1s}$  for pizza FNPs.

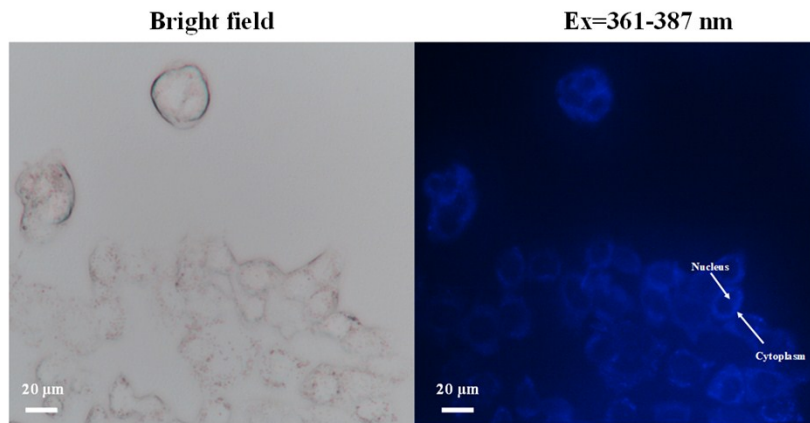

Figure S2. Fluorescent imaging of human gut epithelial (Caco-2) cells incubated with FNPs (1 mg/mL) for 6 h.

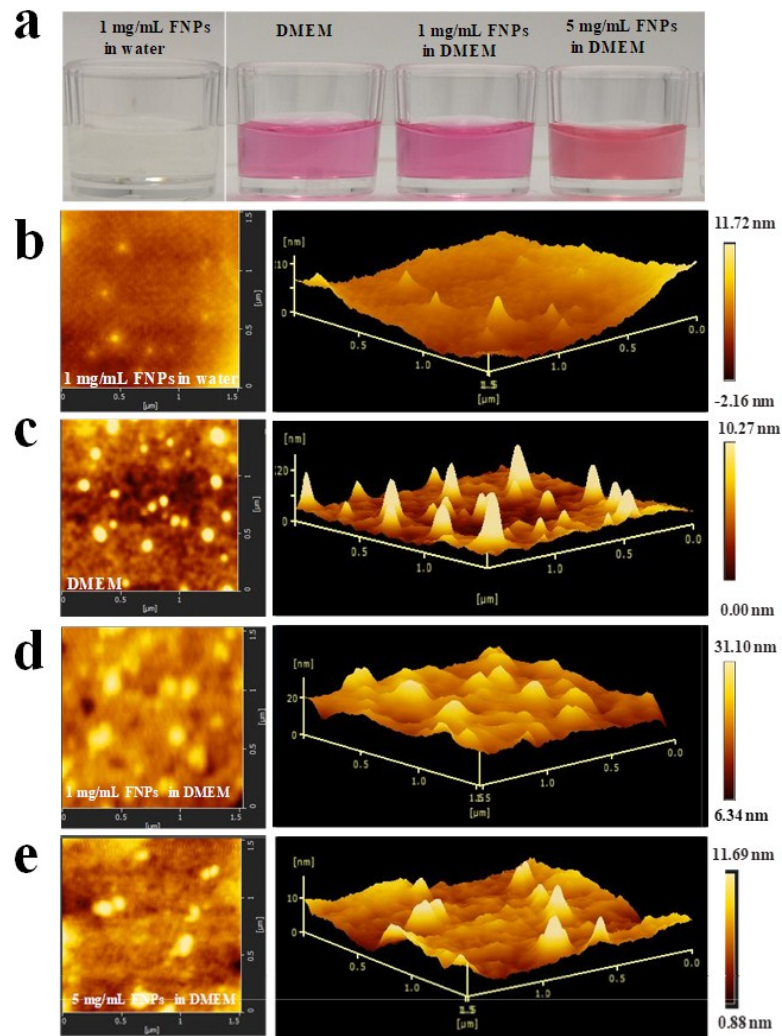

Figure S3. (a) Dispersion of the pizza FNPs in water and DMEM cell culture medium with 10% fetal bovine serum. Atomic force microscopy (AFM) images of (b) FNPs and (c) DMEM cell culture medium with 10% fetal bovine, (d) 1 mg/mL, and (e) 5 mg/mL of FNPs in DMEM cell culture medium with 10% fetal bovine.

Table S1 Comparisons between characteristics of FNPs derived from pizza and those of synthetic carbon dots prepared from ingredients of pizza.

| Food/Ingredients | Size (nm)   | Functional groups                           | UV (nm) | FL (Ex/Em, nm) | Temperature (°C)/time(min) | Reaction              | Reference |
|------------------|-------------|---------------------------------------------|---------|----------------|----------------------------|-----------------------|-----------|
| Pizza            | 3.33 ± 0.76 | -COOH, -OH, -NH <sub>2</sub> , -C=O, -C=C   | 264     | 330 /401       | 200/10                     | Baking                | this work |
| Bread            | 27.5±6.1    | -C=O                                        | ~280    | ~475/---       | /                          | Baking                | 6         |
| Flour            | 1-4         | -OH, -COOH, -NH <sub>2</sub>                | 288     | 365 /442       | 150/20                     | Microwave heating     | 28        |
| Tomato           | 3.0 ± 1.3   | -COOH, -OH, -NH <sub>2</sub> , -C=O         | /       | 367 /440       | 150/120                    | Hydrothermal reaction | 32        |
| Cornflour        | 3.5         | -COOH, -OH, -NH <sub>2</sub> , -C-O-C, -C=O | 282     | 360 /441       | 180/300                    | Hydrothermal reaction | 33        |
| Mushroom         | 2.3 ± 1.3   | -COOH, -OH, -NH <sub>2</sub> , -C=O         | 285     | 370 /455       | 200/360                    | Hydrothermal reaction | 34        |

Note: FL: fluorescence; Ex: excitation; Em: emission.
